# Supplementary material for: Transcriptomic analysis of mouse liver reveals a potential hepato-enteric pathogenic mechanism in acute Toxoplasma gondii infection
Source: Parasit Vectors. 2016 Aug 3;9:427. doi: 10.1186/s13071-016-1716-x (PMC4973073; doi:10.1186/s13071-016-1716-x)
Supplement: Additional file 4: Table S4. — Differentially expressed cellular components. (XLSX 25 kb) [file 13071_2016_1716_MOESM4_ESM.xlsx]

## Sheet: cellular components
GO-ID	p-value	corr p-value	Gene number	Description	Down regulation gene number	Up regulation gene number	Genes in test set
31975	9.71e-31	2.99e-29	206	envelope	161	45	S100A6|PTGS1|LDHD|GCAT|GOT2|BAK1|APOE|MTG1|CYHR1|HIGD1A|ACAA2|GATM|SUCLG1|NNT|SPAG4|HSD11B1|PRODH|HIGD2A|HSD17B10|FDX1|SFXN5|SLC11A2|SLC11A1|RAC2|CEP170|COX6B1|PEMT|IDH2|RAP1GAP2|CML1|GCDH|PHB|MAOB|FDXR|MPC1|MPC2|OCIAD2|VDAC1|BCL2A1D|CHCHD10|BCL2A1B|HMGCS2|BCL2A1A|NIPSNAP1|PRODH2|ACAD11|ATP5D|ATP5E|ATP5B|GJA1|MCCC1|ATP5O|SLC25A1|COX19|ATP5H|ATP5K|ATP5J|AIFM3|NDUFB10|LYN|SLC25A4|NDUFA13|SLC3A1|CLI…
44429	7.96e-45	3.43e-43	205	mitochondrial part	175	30	LDHD|GCAT|GOT2|BAK1|MTG1|MRPL39|HIGD1A|ACAA2|GATM|SUCLG2|SUCLG1|NNT|MRPL49|MRPL48|PRODH|HIGD2A|HSD17B10|COASY|FDX1|HSPA1B|SFXN5|SLC11A2|COX6B1|PEMT|IDH2|CML1|GCDH|PHB|MAOB|FDXR|MPC1|MPC2|OCIAD2|VDAC1|BCL2A1D|CHCHD10|BCL2A1B|HMGCS2|BCL2A1A|MLYCD|NIPSNAP1|PRODH2|ACAD11|ATP5D|ATP5E|ATP5B|GJA1|LONP1|MCCC1|ATP5O|SLC25A1|COX19|ATP5H|SARDH|ATP5K|ATP5J|AIFM3|NDUFB10|LYN|SLC25A4|NDUFA13|SLC3A1|CYB5B|NDUFA…
31967	1.65e-30	4.89e-29	205	organelle envelope	161	44	S100A6|PTGS1|LDHD|GCAT|GOT2|BAK1|APOE|MTG1|CYHR1|HIGD1A|ACAA2|GATM|SUCLG1|NNT|SPAG4|HSD11B1|PRODH|HIGD2A|HSD17B10|FDX1|SFXN5|SLC11A2|RAC2|CEP170|COX6B1|PEMT|IDH2|RAP1GAP2|CML1|GCDH|PHB|MAOB|FDXR|MPC1|MPC2|OCIAD2|VDAC1|BCL2A1D|CHCHD10|BCL2A1B|HMGCS2|BCL2A1A|NIPSNAP1|PRODH2|ACAD11|ATP5D|ATP5E|ATP5B|GJA1|MCCC1|ATP5O|SLC25A1|COX19|ATP5H|ATP5K|ATP5J|AIFM3|NDUFB10|LYN|SLC25A4|NDUFA13|SLC3A1|CLIC1|CYB5B…
9986	2.5e-26	6.93e-25	182	cell surface	45	137	SEPT5|GPR125|TLR2|MMP7|TGFB3|TLR3|AQP4|TLR4|ENPEP|CD53|CXCL12|CXCL10|IL17RB|GOT2|CD48|S1PR1|CD44|AQP11|APOE|IFNG|CHRNA4|ADAM8|IL1A|SPN|EGFR|ICOSL|ADAMTS7|CRHR2|CD38|CCR7|THBD|CLEC12A|CD59B|ABCB1A|CCR5|CD59A|CCR2|CAR4|IL1R1|FGFR3|TNFRSF12A|IFITM3|ITGB2|ITGB3|ABCA1|ADA|CD74|SLC11A2|IL12RB2|FGG|IL12RB1|ECE1|FGA|ITGAX|PROCR|FGB|CD69|ITGB7|ICOS|HEG1|FCER1G|SCARB1|ENTPD1|ANGPTL3|HIP1|TYROBP|CSF1R|HAVCR…
5740	2.34e-42	9.58e-41	175	mitochondrial envelope	147	28	LDHD|GCAT|COX5B|FAHD1|GOT2|SLC25A21|BAK1|UQCR10|UQCR11|CISD1|MTG1|SLC25A23|HADH|HIGD1A|HMGCL|ACAA2|GATM|SUCLG1|COX6C|NNT|MARC1|MARC2|SLC25A36|LRRK2|HIGD2A|PRODH|MAVS|HSD17B10|ASS1|FGR|FDX1|COX7B|COX7C|SFXN5|SLC11A2|FIS1|IVD|GSTK1|IDH2|PEMT|COX6B1|GCDH|CML1|ATP5J2|PHB|MAOB|AK3|FDXR|MPC1|AK2|MPC2|ABCB6|OCIAD2|VDAC1|NDUFV3|TST|IKBKE|SLC25A11|UGT2B37|BCL2A1D|SLC25A13|CHCHD10|HMGCS2|BCL2A1B|UCP2|BCL2A…
31966	1.48e-39	5.55e-38	163	mitochondrial membrane	136	27	LDHD|GCAT|COX5B|FAHD1|GOT2|SLC25A21|BAK1|UQCR10|UQCR11|CISD1|MTG1|SLC25A23|HADH|HIGD1A|HMGCL|ACAA2|GATM|SUCLG1|COX6C|NNT|MARC1|MARC2|SLC25A36|LRRK2|HIGD2A|PRODH|MAVS|HSD17B10|ASS1|FGR|FDX1|COX7B|COX7C|SFXN5|SLC11A2|FIS1|IVD|GSTK1|IDH2|COX6B1|GCDH|CML1|ATP5J2|PHB|MAOB|FDXR|MPC1|AK2|MPC2|ABCB6|OCIAD2|VDAC1|NDUFV3|TST|SLC25A11|UGT2B37|IKBKE|BCL2A1D|SLC25A13|HMGCS2|BCL2A1B|UCP2|BCL2A1A|NDUFV1|SLC25A1…
31410	6.32e-07	8.37e-06	155	cytoplasmic vesicle	46	109	SEPT5|TLR1|TLR2|TGFB3|ENPEP|TLR7|AMOTL2|TLR9|BTK|REG3B|STARD4|SLC2A3|SERPINE1|GBP10|IL1B|ADAM8|EGFR|GBP6|PLD1|NUDT1|GBP5|CLCA1|NGP|NCF2|MADD|BAIAP2|PTPRN2|GBP9|PLD4|SOCS1|NAPSA|UNC13D|HTR7|CAR4|LRRK2|GBP3|GBP2|5430435G22RIK|OLFM4|FGFR3|CCL2|SNX5|IFITM3|UNC93B1|MME|ABCA2|ITGB3|ABCA1|GBP2B|ADA|RAB7|SLC11A2|SLC11A1|ANGPTL6|FGG|BLOC1S5|ECE1|FGA|FGB|CHIL3|SFTPD|ENTPD1|SRGN|HIP1|SREBF1|RILP|GABARAPL1|R…
19866	8.27e-37	2.97e-35	137	organelle inner membrane	123	14	LDHD|GCAT|COX5B|FAHD1|GOT2|SLC25A21|UQCR10|UQCR11|MTG1|SLC25A23|HADH|HIGD1A|HMGCL|ACAA2|GATM|SUCLG1|COX6C|NNT|MARC1|MARC2|SLC25A36|LRRK2|PRODH|HIGD2A|HSD17B10|FGR|FDX1|COX7B|COX7C|SFXN5|GSTK1|IDH2|COX6B1|GCDH|CML1|ATP5J2|PHB|MAOB|FDXR|AK2|MPC1|MPC2|OCIAD2|VDAC1|NDUFV3|TST|SLC25A11|UGT2B37|SLC25A13|HMGCS2|UCP2|NDUFV1|SLC25A10|NIPSNAP1|COQ10B|PRODH2|SLC25A16|CYB5R3|ATP5D|UQCRC2|ATP5E|NDUFAF6|CPT2|U…
5743	4.97e-41	1.95e-39	136	mitochondrial inner membrane	123	13	LDHD|GCAT|COX5B|FAHD1|GOT2|SLC25A21|UQCR10|UQCR11|MTG1|SLC25A23|HADH|HIGD1A|HMGCL|ACAA2|GATM|SUCLG1|COX6C|NNT|MARC1|MARC2|SLC25A36|LRRK2|PRODH|HIGD2A|HSD17B10|FGR|FDX1|COX7B|COX7C|SFXN5|GSTK1|IDH2|COX6B1|GCDH|CML1|ATP5J2|PHB|MAOB|FDXR|AK2|MPC1|MPC2|OCIAD2|VDAC1|NDUFV3|TST|SLC25A11|UGT2B37|SLC25A13|HMGCS2|UCP2|NDUFV1|SLC25A10|NIPSNAP1|COQ10B|PRODH2|SLC25A16|CYB5R3|ATP5D|UQCRC2|ATP5E|NDUFAF6|CPT2|U…
16023	0.000216	0.00168	104	cytoplasmic membrane-bounded vesicle	30	74	SEPT5|TLR1|TGFB3|TLR7|TLR9|REG3B|STARD4|SLC2A3|SERPINE1|IL1B|ADAM8|EGFR|PLD1|CLCA1|NCF2|MADD|BAIAP2|PTPRN2|PLD4|NAPSA|UNC13D|HTR7|LRRK2|CAR4|5430435G22RIK|OLFM4|CCL2|FGFR3|IFITM3|UNC93B1|MME|ABCA2|ABCA1|ITGB3|RAB7|ANGPTL6|SLC11A1|FGG|ECE1|BLOC1S5|FGA|FGB|CHIL3|ENTPD1|SRGN|HIP1|RAB8B|SPPL2A|HILPDA|SLAMF1|ACPP|PLA2G4A|CORO1A|STXBP3A|0610007P14RIK|HP|CD93|CXCR4|SERPINA5|NECAP2|LTF|PAK1|MSN|DPP4|DDC|…
5773	3.59e-11	6.18e-10	102	vacuole	31	71	LGMN|TLR3|ENPEP|TLR7|TLR9|GATA2|APOE|BRI3|ADAM8|IDUA|PLD1|CTRB1|H2-DMB1|NAPSA|H2-DMB2|UNC13D|LRRK2|TM6SF1|5430435G22RIK|FGFR3|LITAF|ASS1|IFITM3|MMD|UNC93B1|ACP5|IFI30|ABCA2|CD74|ADA|RAB7|SLC11A2|SIAE|SLC11A1|CD68|ECE1|LAPTM5|GALC|SCARB1|SRGN|RNF13|RILP|GABARAPL1|LAMTOR4|SPPL2A|ATP11A|ACPP|H2-EB1|MILR1|ATG16L2|3110043O21RIK|ARSG|GJA1|CXCR2|CD1D1|LNPEP|CXCR4|HPSE|MT1|CAT|ATP6V0D2|DPP4|EVA1A|AR|LYN|…
98552	1.25e-20	3.17e-19	101	side of membrane	18	83	GPR125|TLR2|AQP4|PTPN22|TLR4|ENPEP|CXCL12|CXCL10|CD48|S1PR1|CD44|APOE|IFNG|CHRNA4|SPN|ICOSL|CCR7|CD59B|CCR5|CD59A|CCR2|LRRK2|CAR4|FGFR3|ABCA1|ITGB3|ADA|CD74|IL12RB2|FGG|ECE1|IL12RB1|ITGAX|FGA|CD69|FGB|ICOS|FCER1G|HEG1|PTPN7|FCGR4|GALT|SPPL2A|ITGA2|ITGA4|SLAMF7|FCGR1|SLAMF1|ABCG1|CD55|EMR1|RGS2|CD274|PKP4|CHRNB2|CLEC7A|PTPN1|G6PDX|H2-D1|CD1D1|RAET1C|TNFRSF11A|CXCR4|4632428N05RIK|SERPINA5|MSN|H2-K1…
323	8.73e-13	1.6e-11	96	lytic vacuole	29	67	ARSG|LGMN|TLR3|GJA1|CXCR2|ENPEP|CD1D1|TLR7|TLR9|LNPEP|GATA2|HPSE|APOE|CXCR4|MT1|BRI3|CAT|ADAM8|DPP4|IDUA|EVA1A|PLD1|AR|LYN|CTRB1|FLOT1|H2-DMB1|GZMB|CTSS|NAPSA|H2-DMB2|CTSW|CTSJ|UNC13D|PRDX6|H2-AA|SORT1|GNB4|PCYOX1|LRRK2|TM6SF1|CTSF|5430435G22RIK|PRF1|FGFR3|ASS1|LITAF|IFITM3|UNC93B1|MMD|IFI30|ACP5|ABCA2|CTLA2A|TPCN1|ADA|CD74|CTLA2B|TPCN2|RAB7|ANXA6|SLC11A2|SLC11A1|SIAE|CD68|LAPTM5|ECE1|AP3M1|RASGR…
5764	8.73e-13	1.6e-11	96	lysosome	29	67	ARSG|LGMN|TLR3|GJA1|CXCR2|ENPEP|CD1D1|TLR7|TLR9|LNPEP|GATA2|HPSE|APOE|CXCR4|MT1|BRI3|CAT|ADAM8|DPP4|IDUA|EVA1A|PLD1|AR|LYN|CTRB1|FLOT1|H2-DMB1|GZMB|CTSS|NAPSA|H2-DMB2|CTSW|CTSJ|UNC13D|PRDX6|H2-AA|SORT1|GNB4|PCYOX1|LRRK2|TM6SF1|CTSF|5430435G22RIK|PRF1|FGFR3|ASS1|LITAF|IFITM3|UNC93B1|MMD|IFI30|ACP5|ABCA2|CTLA2A|TPCN1|ADA|CD74|CTLA2B|TPCN2|RAB7|ANXA6|SLC11A2|SLC11A1|SIAE|CD68|LAPTM5|ECE1|AP3M1|RASGR…
9897	1.14e-21	2.97e-20	90	external side of plasma membrane	16	74	GPR125|TLR2|H2-D1|AQP4|TLR4|ENPEP|CD1D1|CXCL12|CXCL10|RAET1C|CD48|TNFRSF11A|S1PR1|CD44|APOE|CXCR4|SERPINA5|4632428N05RIK|IFNG|CHRNA4|SPN|H2-K1|ICAM1|ICOSL|CCR7|CD86|CCR5|CD59B|CD80|CD59A|ULBP1|CCR2|H2-AA|CAR4|TNFRSF22|CD244|SIGLECE|TNFRSF23|TNF|CCR1|CXCL9|ITGB3|ABCA1|IL7R|TNFRSF4|ADA|CD74|VCAM1|LY6A|IL12RB2|CD9|FGG|IL12RB1|ECE1|FGA|ITGAX|FGB|CD69|ICOS|HEG1|FCER1G|RTN4RL2|IL2RG|THBS1|SCNN1A|CD28|S…
5912	0.0027	0.0164	62	adherens junction	20	42	KIF23|BCAR1|GJA1|FES|IQGAP1|SPRY4|ARHGAP22|CD44|SNTB2|ZYX|CAT|PAK1|MSN|CIB2|DPP4|EGFR|ICAM1|PTPRM|ADAM10|LYN|LIMK1|FLOT1|FLNA|PLAUR|ARPC1B|CD59B|LCP1|PARVB|PARD3|LIMS2|SHROOM3|VIM|AKAP12|MME|HSPA1A|CDH2|ITGB3|ANXA6|CD9|LPXN|EZR|PROCR|RAC2|PVRL3|TGM2|NDRG1|MLLT4|TES|NOX4|PTPRC|ANXA1|AHI1|ITGA2|EVL|ITGA4|CSRP2|LIN7A|CDH13|ITGA8|ITGA7|GRB7|PLAU
5924	0.00646	0.0363	53	cell-substrate adherens junction	16	37	KIF23|LIMS2|BCAR1|VIM|AKAP12|MME|GJA1|HSPA1A|ITGB3|CDH2|FES|SPRY4|IQGAP1|ANXA6|ARHGAP22|CD9|LPXN|EZR|RAC2|CD44|PROCR|TGM2|SNTB2|ZYX|MSN|CAT|PAK1|CIB2|DPP4|TES|NOX4|EGFR|ICAM1|PTPRC|ADAM10|LIMK1|FLOT1|ANXA1|ITGA2|EVL|ITGA4|CSRP2|FLNA|PLAUR|ARPC1B|CDH13|CD59B|ITGA8|ITGA7|GRB7|LCP1|PLAU|PARVB
30055	0.00853	0.0468	53	cell-substrate junction	16	37	KIF23|LIMS2|BCAR1|VIM|AKAP12|MME|GJA1|HSPA1A|ITGB3|CDH2|FES|SPRY4|IQGAP1|ANXA6|ARHGAP22|CD9|LPXN|EZR|RAC2|CD44|PROCR|TGM2|SNTB2|ZYX|MSN|CAT|PAK1|CIB2|DPP4|TES|NOX4|EGFR|ICAM1|PTPRC|ADAM10|LIMK1|FLOT1|ANXA1|ITGA2|EVL|ITGA4|CSRP2|FLNA|PLAUR|ARPC1B|CDH13|CD59B|ITGA8|ITGA7|GRB7|LCP1|PLAU|PARVB
42579	4.13e-17	9.12e-16	52	microbody	45	7	ACOX2|EHHADH|PEX6|AGXT|ACOT4|PEX7|ACOT3|PECR|TMEM173|MPV17L|HRSP12|PXMP2|NOS2|CAT|HMGCL|ACNAT1|DECR2|TMEM135|DHRS4|PRDX6|MARC2|HAO2|PEX26|TYSND1|ZADH2|SLC27A2|CROT|MAVS|XDH|HACL1|VIM|ALDH3A2|PIPOX|FIS1|FNDC5|ACSL1|GSTK1|NUDT7|ABCD2|ABCD3|IDH1|ACAA1A|ACSL4|ACAA1B|RAB8B|EPHX2|SERHL|ISOC1|SOD1|MLYCD|FABP1|ACAD11
5777	4.13e-17	9.12e-16	52	peroxisome	45	7	ACOX2|EHHADH|PEX6|AGXT|ACOT4|PEX7|ACOT3|PECR|TMEM173|MPV17L|HRSP12|PXMP2|NOS2|CAT|HMGCL|ACNAT1|DECR2|TMEM135|DHRS4|PRDX6|MARC2|HAO2|PEX26|TYSND1|ZADH2|SLC27A2|CROT|MAVS|XDH|HACL1|VIM|ALDH3A2|PIPOX|FIS1|FNDC5|ACSL1|GSTK1|NUDT7|ABCD2|ABCD3|IDH1|ACAA1A|ACSL4|ACAA1B|RAB8B|EPHX2|SERHL|ISOC1|SOD1|MLYCD|FABP1|ACAD11
44455	1.22e-15	2.56e-14	51	mitochondrial membrane part	45	6	ATP5D|UQCRC2|ATP5E|UQCRC1|ATP5B|PINK1|UQCRFS1|NDUFS7|IMMP2L|NDUFS6|BAK1|UQCR10|NDUFS8|ATP5O|NDUFS3|ATP5H|NDUFS2|ATP5K|ATP5J|NDUFB10|LYN|NDUFA13|NDUFA10|NDUFA12|CCDC109B|LRRK2|NDUFB4|NDUFB5|NDUFB6|NDUFB7|FDX1|NDUFB8|NDUFB9|COX7B|ATP5G1|FIS1|ARMCX3|ACSL4|NDUFA4|ATP5J2|COX7A1|NDUFA9|NDUFA6|PHB|NDUFA7|ABCB6|NDUFV3|SDHB|SDHC|NDUFV1|ATP5A1
5759	8.61e-09	1.32e-07	48	mitochondrial matrix	45	3	TUFM|COASY|MRPS35|ATP5B|NFS1|HSPA1B|AGXT|ALAS1|LONP1|MRPL12|DDX28|MRPL15|IVD|MTG1|GSTK1|MRPL39|SARDH|TERT|ETFB|ETFA|BCKDHA|PDK2|ALKBH7|ACAA2|SHMT2|NUDT1|NDUFA9|SUCLG2|ACADS|SUCLG1|AK3|MRPS5|MID1|PARK7|SIRT3|VDAC1|HAGH|ACADVL|DBT|TRAP1|ACSM1|MRPL28|HMGCS2|MLYCD|MRPL49|H2-KE6|MRPL48|LRRK2
45121	0.00242	0.0148	44	membrane raft	11	33	FXYD1|TNF|ERBB4|ATP1B3|PML|GJA1|ITGB2|ABCA1|GPRC5B|BTK|CD48|EZR|HPSE|SLC2A3|HMOX1|FCER1G|NOS3|SCARB1|RTN4RL2|CYS1|MYOF|CD28|EGFR|LAMTOR4|LYN|FLOT1|ARID3A|RGS19|PARK2|RGS16|BIRC3|IRS1|FCGR1|CDH13|CARD11|PLSCR1|CBLB|ADRB2|CD55|GNAS|LRRK2|PDZK1|CD14|F2R
72562	4.44e-15	8.69e-14	42	blood microparticle	13	29	A2M|C3|SERPINA3C|HP|HSPA1A|C1S|C1QC|ACTG1|C1RA|LGALS3BP|FGG|C1RB|APOA2|FGA|FGB|BCHE|ALB|APOE|ITIH4|CFH|SERPINC1|MSN|CIB2|FN1|APCS|C4A|CD5L|SERPING1|CLIC1|C8G|C8A|A1BG|SERPINA3K|C1QB|SERPINA3N|AFM|ACSM1|SERPINA3M|HPX|DBP|PON1|CP
43209	0.000127	0.00104	39	myelin sheath	29	10	TUFM|UQCRC2|PARD3|UQCRC1|ASS1|ATP5B|STIP1|UQCRFS1|GOT2|ACTG1|PKM|GSTM1|EZR|ALB|NDRG1|SRD5A1|ATP5O|CNTNAP1|MSN|GSTO1|NDUFS3|SUCLA2|ATP5H|AR|SLC25A4|CAR13|PHB|ATP1A3|FAM213B|NDUFA10|SOD1|VDAC1|SDHA|CD59B|TPPP|PEBP1|GNB4|ATP5A1|MDH1
5774	0.00024	0.00184	38	vacuolar membrane	12	26	5430435G22RIK|LITAF|TLR3|ABCA2|ENPEP|TPCN1|TPCN2|RAB7|ANXA6|SLC11A2|LNPEP|LAPTM5|ECE1|AP3M1|SCARB1|VMP1|ATP6V0D2|DPP4|RNF13|PLD1|GABARAPL1|FLOT1|SPPL2A|ATP11A|SLC3A1|ACPP|H2-DMB2|MARCH1|AP5B1|H2-EB1|GNB4|PCYOX1|CP|H2-DMA|ATP6V0A4|ATG16L2|TM6SF1|SLC15A3
44437	0.000493	0.00348	38	vacuolar part	12	26	5430435G22RIK|LITAF|TLR3|ABCA2|ENPEP|TPCN1|TPCN2|RAB7|ANXA6|SLC11A2|LNPEP|LAPTM5|ECE1|AP3M1|SCARB1|VMP1|ATP6V0D2|DPP4|RNF13|PLD1|GABARAPL1|FLOT1|SPPL2A|ATP11A|SLC3A1|ACPP|H2-DMB2|MARCH1|AP5B1|H2-EB1|GNB4|PCYOX1|CP|H2-DMA|ATP6V0A4|ATG16L2|TM6SF1|SLC15A3
1990204	1.55e-15	3.17e-14	36	oxidoreductase complex	33	3	UQCRC2|NDUFB4|NDUFB5|NDUFB6|UQCRC1|NDUFB7|NDUFB8|NDUFB9|UQCRFS1|PDHB|GPD1L|NDUFS7|NDUFS6|UQCR10|NDUFS8|GCSH|NDUFS3|DHTKD1|NDUFS2|NOX4|BCKDHA|PDK2|NDUFB10|NDUFA9|NDUFA6|NCF4|NDUFA7|NDUFA13|NDUFA10|NDUFA12|NDUFV3|CYBA|SDHB|CYBB|SDHC|NDUFV1
70469	1.07e-15	2.3e-14	33	respiratory chain	33	0	UQCRC2|NDUFB4|NDUFB5|NDUFB6|UQCRC1|NDUFB7|NDUFB8|NDUFB9|CYC1|COX7B|UQCRFS1|UQCRQ|NDUFS7|NDUFS6|UQCR10|UQCR11|NDUFS8|NDUFS3|NDUFS2|HIGD1A|NDUFA4|NDUFB10|COX7A1|NDUFA9|NDUFA6|NDUFA7|NDUFA13|NDUFA10|NDUFA12|NDUFV3|SDHB|SDHC|NDUFV1
31225	5.97e-05	0.000536	32	anchored component of membrane	8	24	TNFRSF23|CD52|NRN1|RAET1A|VCAM1|LY6A|RAET1C|CD48|RGMB|LY6D|CD177|RTN4RL2|TREH|NT5E|VNN3|DPEP2|BST1|LY6I|GAS1|PLAUR|LY6C2|DOK1|CDH13|CD55|CD59B|CD59A|ULBP1|CP|CAR4|NTM|GFRA2|CD14
5770	0.000308	0.0023	31	late endosome	8	23	5430435G22RIK|LGMN|SORL1|GJA1|HP|SFTPA1|CD1D1|CD74|RAB7|ANXA6|SLC11A2|SLC11A1|CXCR4|APOE|SFTPD|SLC31A2|RNF13|MVB12B|EGFR|RILP|IRGM1|LAMTOR4|SPPL2A|H2-AB1|ACPP|H2-DMB2|MARCH1|H2-EB1|LIPC|H2-DMA|F2R
5765	0.00161	0.0102	30	lysosomal membrane	9	21	LITAF|TLR3|ABCA2|ENPEP|TPCN1|TPCN2|ANXA6|SLC11A2|LNPEP|LAPTM5|ECE1|AP3M1|SCARB1|DPP4|RNF13|PLD1|FLOT1|SPPL2A|ATP11A|ACPP|H2-DMB2|MARCH1|AP5B1|H2-EB1|GNB4|CP|ATP6V0A4|H2-DMA|SLC15A3|TM6SF1
31227	0.000397	0.0029	22	intrinsic component of endoplasmic reticulum membrane	15	7	SCD1|FKBP8|LRIT1|SPPL2A|CYP2E1|DERL3|TECR|TAPBP|EMC9|G6PC|AGPAT6|DGAT2|INSIG2|FITM1|TAP2|EMC6|TAP1|INSIG1|LRMP|ELOVL6|SLC27A2|SLC27A5
30139	0.00469	0.0273	21	endocytic vesicle	1	20	5430435G22RIK|EGFR|PLD1|CCL2|RAB8B|TLR1|PLD4|UNC93B1|HP|ABCA1|TLR7|SLAMF1|ANXA3|TLR9|RAB7|RAB11FIP4|SLC11A1|CORO1A|RAB39|ADAM8|DPP4
45271	5.44e-11	8.67e-10	20	respiratory chain complex I	20	0	NDUFB4|NDUFB5|NDUFB6|NDUFB10|NDUFB7|NDUFA9|NDUFB8|NDUFA6|NDUFB9|NDUFA7|NDUFA13|NDUFA10|NDUFA12|NDUFV3|NDUFS7|NDUFS6|NDUFV1|NDUFS8|NDUFS3|NDUFS2
5747	5.44e-11	8.67e-10	20	mitochondrial respiratory chain complex I	20	0	NDUFB4|NDUFB5|NDUFB6|NDUFB10|NDUFB7|NDUFA9|NDUFB8|NDUFA6|NDUFB9|NDUFA7|NDUFA13|NDUFA10|NDUFA12|NDUFV3|NDUFS7|NDUFS6|NDUFV1|NDUFS8|NDUFS3|NDUFS2
30964	5.44e-11	8.67e-10	20	NADH dehydrogenase complex	20	0	NDUFB4|NDUFB5|NDUFB6|NDUFB10|NDUFB7|NDUFA9|NDUFB8|NDUFA6|NDUFB9|NDUFA7|NDUFA13|NDUFA10|NDUFA12|NDUFV3|NDUFS7|NDUFS6|NDUFV1|NDUFS8|NDUFS3|NDUFS2
31970	6.24e-05	0.000554	20	organelle envelope lumen	16	4	HSD3B2|SUOX|HSD3B3|SHMT2|NDUFB7|GATM|LYN|SORL1|AK3|PINK1|AK2|SOD1|PARK7|TRAP1|PRELID2|CHCHD10|BCHE|CAT|COX19|GGNBP1
44438	1.7e-05	0.00017	19	microbody part	18	1	MAVS|RAB8B|PEX6|DECR2|AGXT|PEX7|FIS1|PECR|DHRS4|ACSL1|PRDX6|MLYCD|PEX26|ABCD2|ABCD3|PXMP2|FABP1|CAT|SLC27A2
44439	1.7e-05	0.00017	19	peroxisomal part	18	1	MAVS|RAB8B|PEX6|DECR2|AGXT|PEX7|FIS1|PECR|DHRS4|ACSL1|PRDX6|MLYCD|PEX26|ABCD2|ABCD3|PXMP2|FABP1|CAT|SLC27A2
5758	3.87e-05	0.000351	18	mitochondrial intermembrane space	15	3	HSD3B2|SUOX|HSD3B3|SHMT2|NDUFB7|GATM|LYN|AK3|PINK1|AK2|SOD1|PARK7|TRAP1|PRELID2|CHCHD10|CAT|COX19|GGNBP1
5795	0.000834	0.00561	17	Golgi stack	3	14	H2-K1|H2-Q4|PLD1|H2-Q10|ATL1|SORL1|H2-Q1|H2-D1|GALT|SGMS1|LPCAT2|ACPP|GOLGA7|NUCB2|CSGALNACT2|B4GALNT4|SMPD3
31985	0.0001	0.000839	15	Golgi cisterna	2	13	H2-K1|H2-Q4|PLD1|H2-Q10|ATL1|H2-Q1|SORL1|H2-D1|GALT|SGMS1|ACPP|NUCB2|CSGALNACT2|B4GALNT4|SMPD3
45335	7.66e-05	0.000673	15	phagocytic vesicle	0	15	5430435G22RIK|RAB8B|PLD4|TLR1|UNC93B1|ABCA1|TLR7|SLAMF1|ANXA3|TLR9|RAB7|SLC11A1|CORO1A|RAB39|ADAM8
31903	0.000298	0.00225	14	microbody membrane	13	1	MAVS|RAB8B|PEX6|DECR2|FIS1|PECR|ACSL1|DHRS4|PEX26|ABCD2|ABCD3|PXMP2|CAT|SLC27A2
5778	0.000298	0.00225	14	peroxisomal membrane	13	1	MAVS|RAB8B|PEX6|DECR2|FIS1|PECR|ACSL1|DHRS4|PEX26|ABCD2|ABCD3|PXMP2|CAT|SLC27A2
16469	0.00032	0.00238	13	proton-transporting two-sector ATPase complex	12	1	ATP5D|ATP5E|ATP5J2|ATP5B|ATP5G1|ATP5G3|ATP5O|ATP5A1|ATP6V0A4|ATP6V0D2|ATP5H|ATP5K|ATP5J
42611	3.8e-07	5.19e-06	13	MHC protein complex	1	12	H2-K1|H2-Q4|H2-Q10|H2-L|H2-M3|H2-Q1|H2-D1|H2-DMB1|H2-AB1|H2-DMB2|H2-EB1|H2-AA|H2-DMA
45259	3.43e-07	4.85e-06	11	proton-transporting ATP synthase complex	11	0	ATP5D|ATP5E|ATP5J2|ATP5B|ATP5O|ATP5G1|ATP5A1|ATP5G3|ATP5H|ATP5K|ATP5J
46658	0.00169	0.0105	11	anchored component of plasma membrane	3	8	RAET1C|CD48|RGMB|TNFRSF23|CD59B|ULBP1|RTN4RL2|CP|GAS1|CAR4|RAET1A
5753	3.73e-07	5.17e-06	10	mitochondrial proton-transporting ATP synthase complex	10	0	ATP5D|ATP5E|ATP5J2|ATP5B|ATP5O|ATP5G1|ATP5A1|ATP5H|ATP5K|ATP5J
8305	0.000435	0.00312	10	integrin complex	1	9	ITGA9|ITGAX|LYN|ITGA8|ITGB7|ITGA7|ITGA2|ITGB2|ITGA4|ITGB3
98636	0.000435	0.00312	10	protein complex involved in cell adhesion	1	9	ITGA9|ITGAX|LYN|ITGA8|ITGB7|ITGA7|ITGA2|ITGB2|ITGA4|ITGB3
5771	0.00143	0.0094	10	multivesicular body	1	9	EGFR|SORL1|SFTPD|GJA1|H2-AB1|SFTPA1|H2-DMA|ACPP|H2-DMB2|CD74
43245	4e-06	4.65e-05	10	extraorganismal space	0	10	GBP6|IRGM2|C4A|TAP2|GBP9|TAP1|IIGP1|GBP2B|GBP3|GBP2
44216	4e-06	4.65e-05	10	other organism cell	0	10	GBP6|IRGM2|C4A|TAP2|GBP9|TAP1|IIGP1|GBP2B|GBP3|GBP2
44217	4e-06	4.65e-05	10	other organism part	0	10	GBP6|IRGM2|C4A|TAP2|GBP9|TAP1|IIGP1|GBP2B|GBP3|GBP2
44215	4e-06	4.65e-05	10	other organism	0	10	GBP6|IRGM2|C4A|TAP2|GBP9|TAP1|IIGP1|GBP2B|GBP3|GBP2
34385	3.77e-05	0.000346	9	triglyceride-rich lipoprotein particle	8	1	APOA2|APOE|APOC4|APOC3|APOBR|APOC1|PCYOX1|APOM|VLDLR
34361	3.77e-05	0.000346	9	very-low-density lipoprotein particle	8	1	APOA2|APOE|APOC4|APOC3|APOBR|APOC1|PCYOX1|APOM|VLDLR
33177	0.000169	0.00132	9	proton-transporting two-sector ATPase complex, proton-transporting domain	8	1	ATP5J2|ATP5O|ATP5G1|ATP6V0A4|ATP5G3|ATP5H|ATP6V0D2|ATP5K|ATP5J
42629	1.09e-05	0.000115	9	mast cell granule	2	7	GATA2|AR|LYN|RASGRP1|ANXA1|MILR1|CXCR2|SRGN|SCO1
1772	0.00148	0.00957	9	immunological synapse	1	8	ICAM1|CARD11|CORO1A|CD37|ZAP70|CD53|SCIMP|RHOH|CD28
43657	1.09e-05	0.000115	9	host cell	0	9	GBP6|IRGM2|TAP2|GBP9|TAP1|IIGP1|GBP2B|GBP3|GBP2
18995	1.09e-05	0.000115	9	host	0	9	GBP6|IRGM2|TAP2|GBP9|TAP1|IIGP1|GBP2B|GBP3|GBP2
2102	0.000104	0.000861	8	podosome	0	8	VCAM1|SH3PXD2B|LPXN|FERMT3|ADAM8|BIN2|LCP1|TPM3
45263	8.09e-05	0.00069	7	proton-transporting ATP synthase complex, coupling factor F(o)	7	0	ATP5J2|ATP5O|ATP5G1|ATP5G3|ATP5H|ATP5K|ATP5J
20003	4.94e-06	5.67e-05	7	symbiont-containing vacuole	0	7	GBP6|IRGM2|GBP9|IIGP1|GBP2B|GBP3|GBP2
30430	3.72e-05	0.000346	7	host cell cytoplasm	0	7	GBP6|IRGM2|GBP9|IIGP1|GBP2B|GBP3|GBP2
43656	3.72e-05	0.000346	7	intracellular region of host	0	7	GBP6|IRGM2|GBP9|IIGP1|GBP2B|GBP3|GBP2
33655	3.72e-05	0.000346	7	host cell cytoplasm part	0	7	GBP6|IRGM2|GBP9|IIGP1|GBP2B|GBP3|GBP2
33646	3.72e-05	0.000346	7	host intracellular part	0	7	GBP6|IRGM2|GBP9|IIGP1|GBP2B|GBP3|GBP2
33643	0.000159	0.00127	7	host cell part	0	7	GBP6|IRGM2|GBP9|IIGP1|GBP2B|GBP3|GBP2
276	9.78e-05	0.000825	6	mitochondrial proton-transporting ATP synthase complex, coupling factor F(o)	6	0	ATP5J2|ATP5O|ATP5G1|ATP5H|ATP5K|ATP5J
70069	0.00217	0.0133	6	cytochrome complex	6	0	NDUFA4|UQCRC2|UQCR10|UQCRC1|UQCRFS1|UGT1A1
31907	0.00918	0.0494	6	microbody lumen	6	0	MLYCD|PRDX6|ABCD3|FABP1|AGXT|PEX7
5782	0.00918	0.0494	6	peroxisomal matrix	6	0	MLYCD|PRDX6|ABCD3|FABP1|AGXT|PEX7
42612	0.00329	0.0198	6	MHC class I protein complex	1	5	H2-K1|H2-Q10|H2-Q4|H2-L|H2-Q1|H2-D1
5797	0.00478	0.0274	6	Golgi medial cisterna	1	5	H2-K1|H2-Q10|H2-Q4|NUCB2|H2-Q1|H2-D1
20005	9.88e-06	0.000109	6	symbiont-containing vacuole membrane	0	6	GBP6|GBP9|IIGP1|GBP2B|GBP3|GBP2
42613	3.59e-05	0.000346	6	MHC class II protein complex	0	6	H2-EB1|H2-AA|H2-DMB1|H2-AB1|H2-DMA|H2-DMB2
31091	0.00478	0.0274	6	platelet alpha granule	0	6	FGG|FGA|FGB|SERPINA5|STXBP3A|THBS1
72557	7.9e-05	0.00068	5	IPAF inflammasome complex	0	5	NAIP6|NLRC4|CASP4|NAIP5|CASP1
5577	7.9e-05	0.00068	5	fibrinogen complex	0	5	FGG|FGA|FGB|THBS1|FN1
1891	0.00597	0.0338	5	phagocytic cup	0	5	CORO1A|TNF|AIF1|MYO1G|LCP1
42581	0.00885	0.0482	5	specific granule	0	5	OLFM4|LTF|STXBP3A|ADAM8|ANXA3
275	0.000614	0.00423	4	mitochondrial proton-transporting ATP synthase complex, catalytic core F(1)	4	0	ATP5D|ATP5E|ATP5B|ATP5A1
45261	0.000614	0.00423	4	proton-transporting ATP synthase complex, catalytic core F(1)	4	0	ATP5D|ATP5E|ATP5B|ATP5A1
45275	0.00168	0.0105	4	respiratory chain complex III	4	0	UQCRC2|UQCR10|UQCRC1|UQCRFS1
5750	0.00168	0.0105	4	mitochondrial respiratory chain complex III	4	0	UQCRC2|UQCR10|UQCRC1|UQCRFS1
72559	0.000134	0.00108	4	NLRP3 inflammasome complex	0	4	CASP4|PYCARD|CASP1|NLRP3
97169	0.000134	0.00108	4	AIM2 inflammasome complex	0	4	CASP4|PYCARD|CASP1|AIM2
31254	0.00359	0.0213	4	cell trailing edge	0	4	EZR|MSN|SCIMP|SPN
1931	0.00359	0.0213	4	uropod	0	4	EZR|MSN|SCIMP|SPN
778	0.00658	0.0368	4	condensed nuclear chromosome kinetochore	0	4	CCNB1|BUB1B|CENPE|NDC80
42824	0.00459	0.0269	3	MHC class I peptide loading complex	0	3	TAP2|TAP1|TAPBP
